# Supplementary material for: Diet Modulates the Gut Microbiome, Metabolism, and Mammary Gland Inflammation to Influence Breast Cancer Risk
Source: PubMed Central journal article supplement — Cancer Prev Res (Phila). 2024 May 3;17(9):415–28. doi: 10.1158/1940-6207.CAPR-24-0055 (PMC11372361; doi:10.1158/1940-6207.capr-24-0055), 2024-05-03
Supplement: capr-24-0055_supplemental_figure_2_suppsf2.pdf [file capr-24-0055_supplemental_figure_2_suppsf2.pdf]

**A**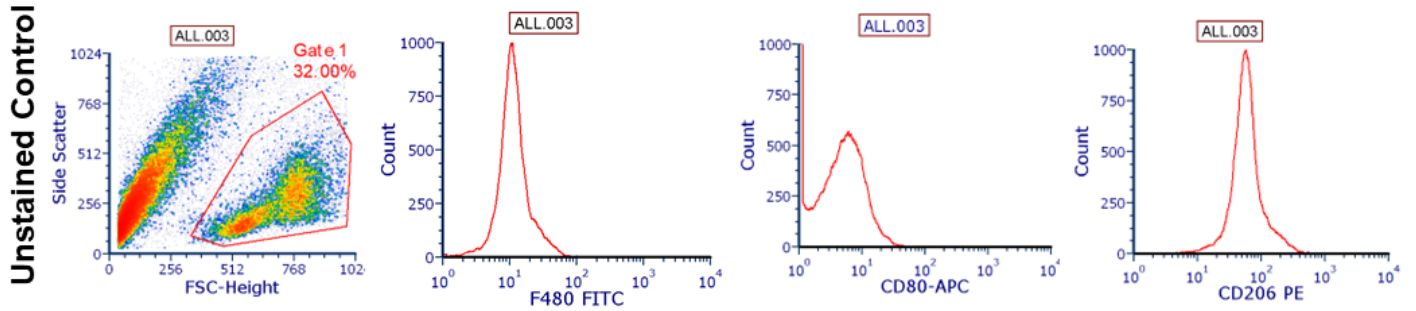**B F4/80 Only Control****C CD80 Only Control****D CD206 Only Control**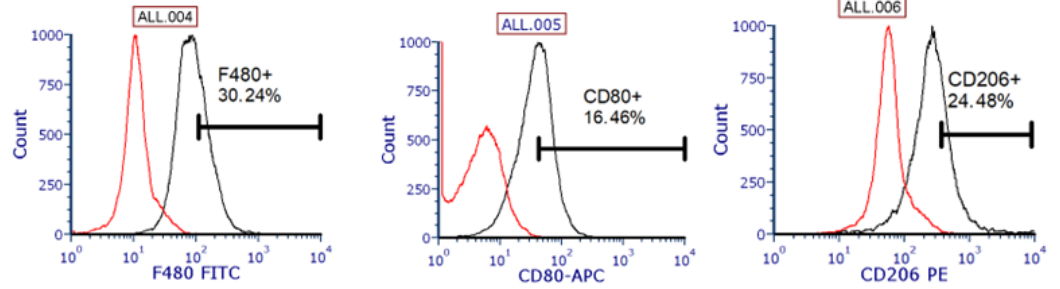

**Supplemental Figure 2.** Mammary gland tissue flow cytometry controls. A. Representative unstained flow plot controls. B. Representative single antibody controls.
