# Supplementary material for: Diet Modulates the Gut Microbiome, Metabolism, and Mammary Gland Inflammation to Influence Breast Cancer Risk
Source: PubMed Central journal article supplement — Cancer Prev Res (Phila). 2024 May 3;17(9):415–28. doi: 10.1158/1940-6207.CAPR-24-0055 (PMC11372361; doi:10.1158/1940-6207.capr-24-0055), 2024-05-03
Supplement: capr-24-0055_supplemental_figure_3_suppsf3.pdf [file capr-24-0055_supplemental_figure_3_suppsf3.pdf]

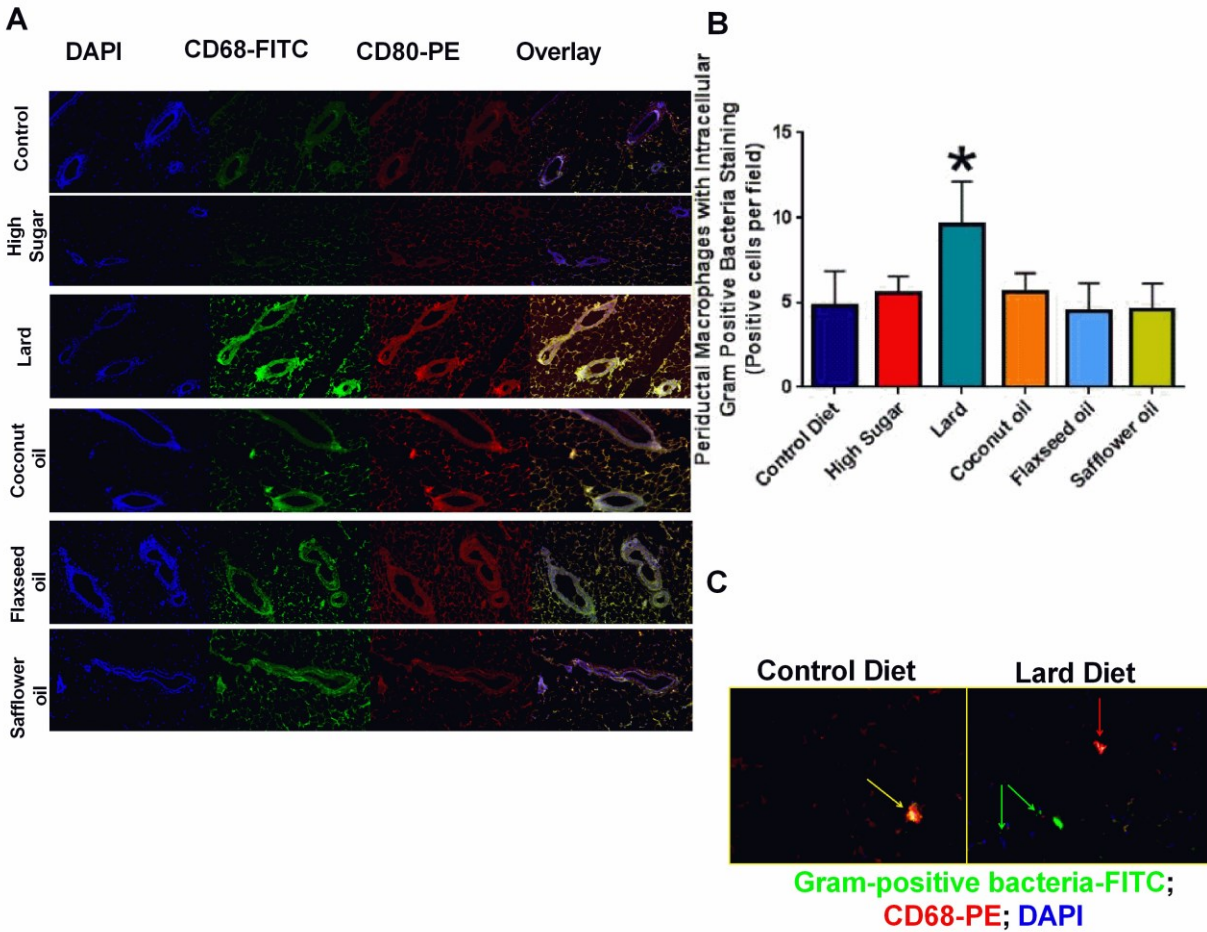

**Supplemental Figure 3.** A. Individual filter components of mammary gland fluorescent images DAPI, CD68-FITC, CD80-PE, and overlay. B. Quantification of periductal gram positive bacteria laden cells in the mammary glands of mice fed differing diets. C. Gram-positive bacteria in mammary gland tissue does not co-localize with macrophages in lard diet-fed animals.
